# Supplementary material for: A semiconductor Sc2S3 monolayer with ultrahigh carrier mobility for UV blocking filter application
Source: Royal Society of Chemistry journal article supplement (doi:10.1039/d2cp04973b), 2023-01-01
Supplement: d2cp04973b1.pdf [file d2cp04973b1.pdf]

## Supporting Information

### **Semiconductor $\text{Sc}_2\text{S}_3$ monolayer with ultrahigh carrier mobility and UV blocking filter application**

Zheng Wang,<sup>a</sup> Haifei Qin,<sup>b</sup> Jiao Chen,<sup>a</sup> Xinyong Cai,<sup>a</sup> Panlong Kong,<sup>a</sup> Zhen Liu,<sup>c, \*</sup> Bai Sun,<sup>d</sup>  
Hongyan Wang,<sup>a</sup> Yuxiang Ni,<sup>a</sup> Yuanzheng Chen<sup>a, \*</sup>

<sup>a</sup> *School of Physical Science and Technology, Southwest Jiaotong University, Chengdu 610031, China*

<sup>b</sup> *School of Physics and Astronomy, Shanghai Jiao Tong University, Shanghai 200240, China*

<sup>c</sup> *Department of Physics, Beijing Normal University, Beijing 100875, China*

<sup>d</sup> *Frontier Institute of Science and Technology (FIST), Xi'an Jiaotong University, No.28, Xianning West Road, Xi'an, Shaanxi 710049, P.R. China*

*Email: (Z. L.) [liuz@bnu.edu.cn](mailto:liuz@bnu.edu.cn); (Y. C.) [cyz@swjtu.edu.cn](mailto:cyz@swjtu.edu.cn)*

---

## 1. Details of structure prediction

The particle swarm optimization (PSO) method within the evolutionary algorithm as implemented in the CALYPSO code was employed to find the lowest energy structures of 2D  $\text{Sc}_x\text{S}_{1-x}$  ( $0 < x < 1$ ) monolayer. The unit cells containing 1, 2, 3, and 4 formula units (f.u.) were considered. In the first step, random structures with certain symmetry are constructed in which atomic coordinates are generated by the 2D crystallographic symmetry operations. Local optimizations using the VASP code were done with the conjugate gradients method and stopped when Gibbs free energy changes became smaller than  $1 \times 10^{-5}$  eV per cell. After processing the first generation structures, 60% of them with lower Gibbs free energies are selected to construct the next generation structures by PSO. 40% of the structures in the new generation are randomly generated. A structure fingerprinting technique of bond characterization matrix is applied to the generated structures, so that identical structures are strictly forbidden. These procedures significantly enhance the diversity of the structures, which is crucial for structural global search efficiency. In most cases, structural searching simulations for each calculation were stopped after generating 1000 ~ 1200 structures (e.g., about 20 ~ 35 generations).

## 2. The related graphs of discussions in the paper

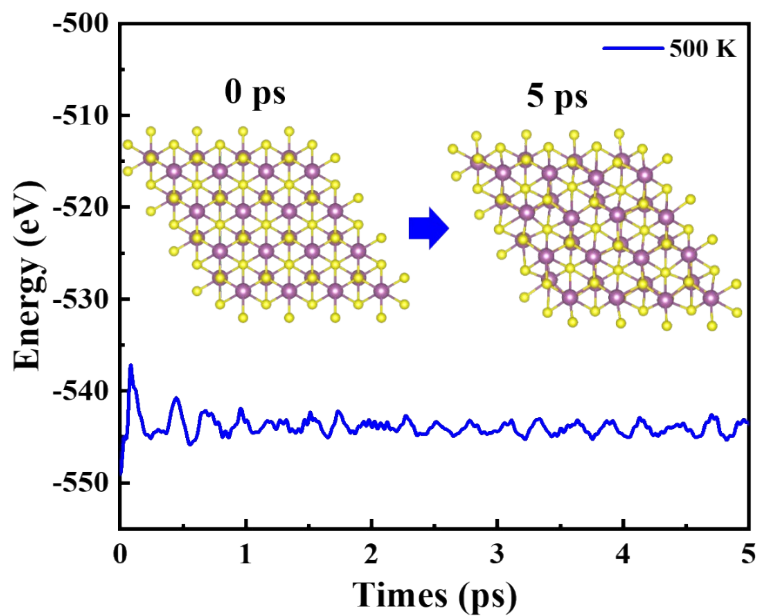

Figure S1. Snapshot of the final frame of the Sc<sub>2</sub>S<sub>3</sub> monolayer at 500K of MD simulation.

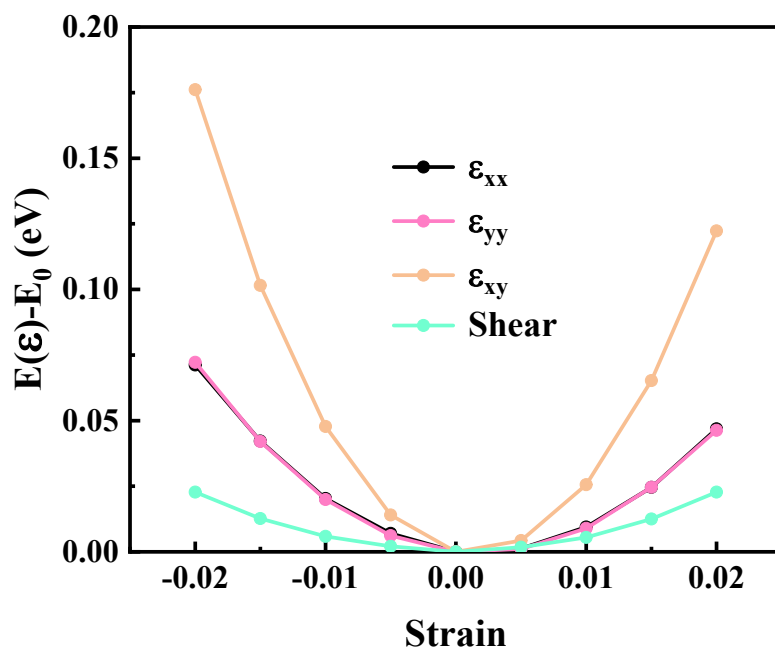

Figure S2. Energy variation curves of Sc<sub>2</sub>S<sub>3</sub> monolayer with uniaxial, biaxial, and shear strain.

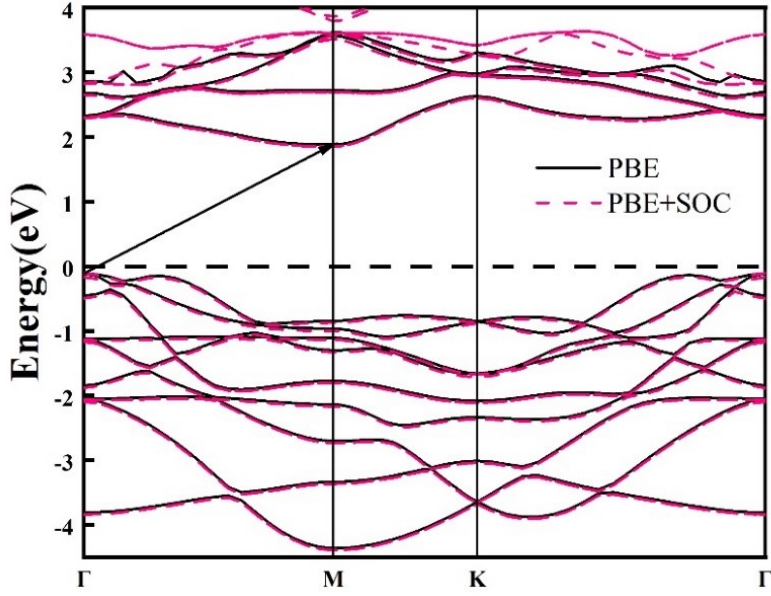

**Figure S3.** The band structures of  $\text{Sc}_2\text{S}_3$  monolayer based on PBE and PBE+SOC.

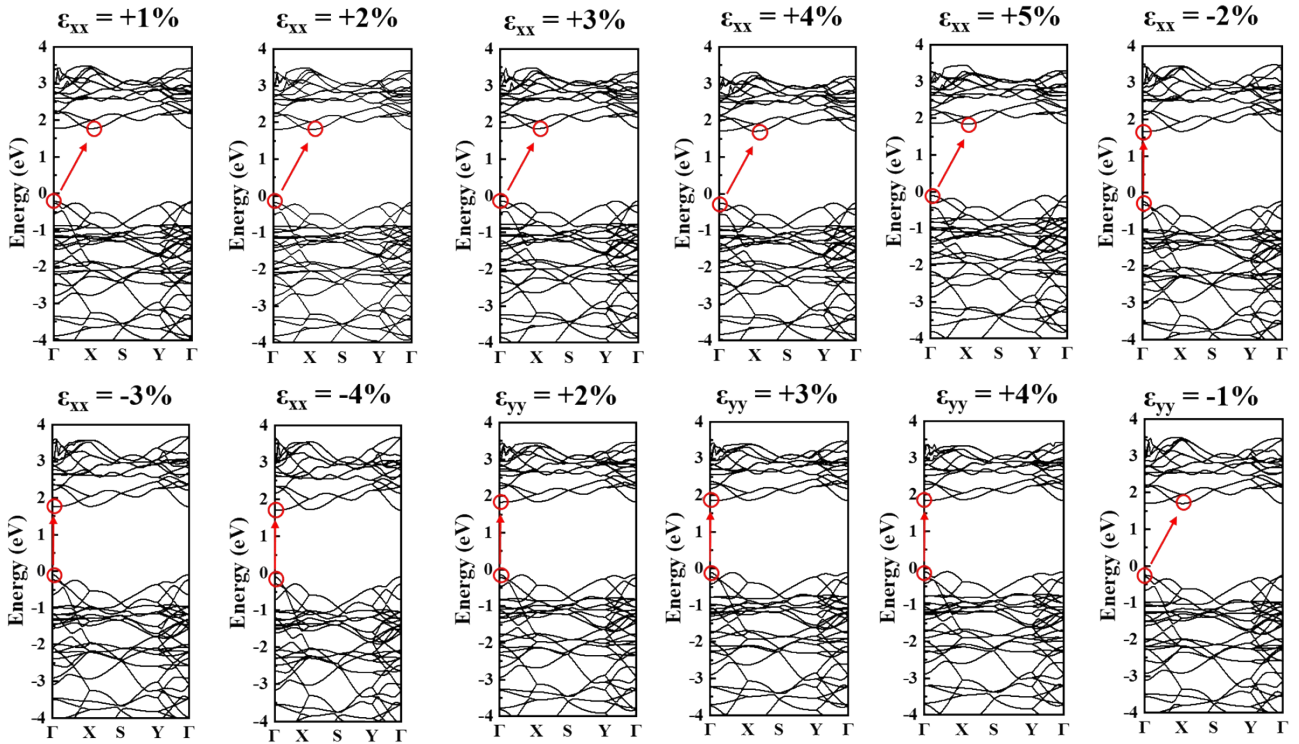

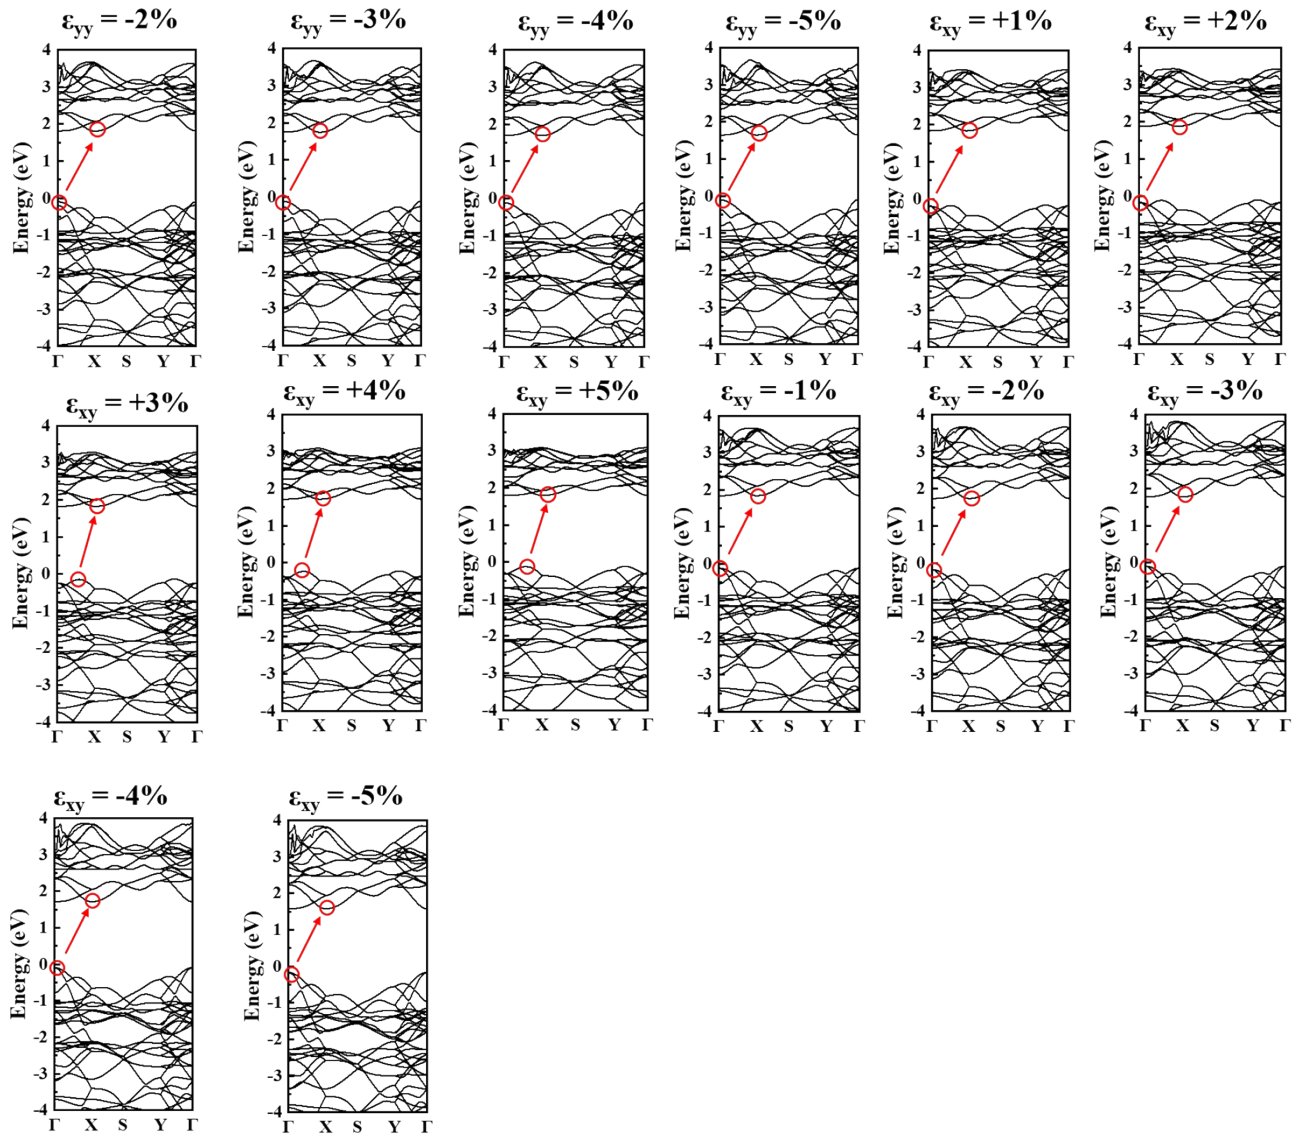

**Figure S4.** Dependence of band gaps under biaxial and uniaxial strain (-5%~5%) for Sc<sub>2</sub>S<sub>3</sub> monolayer.

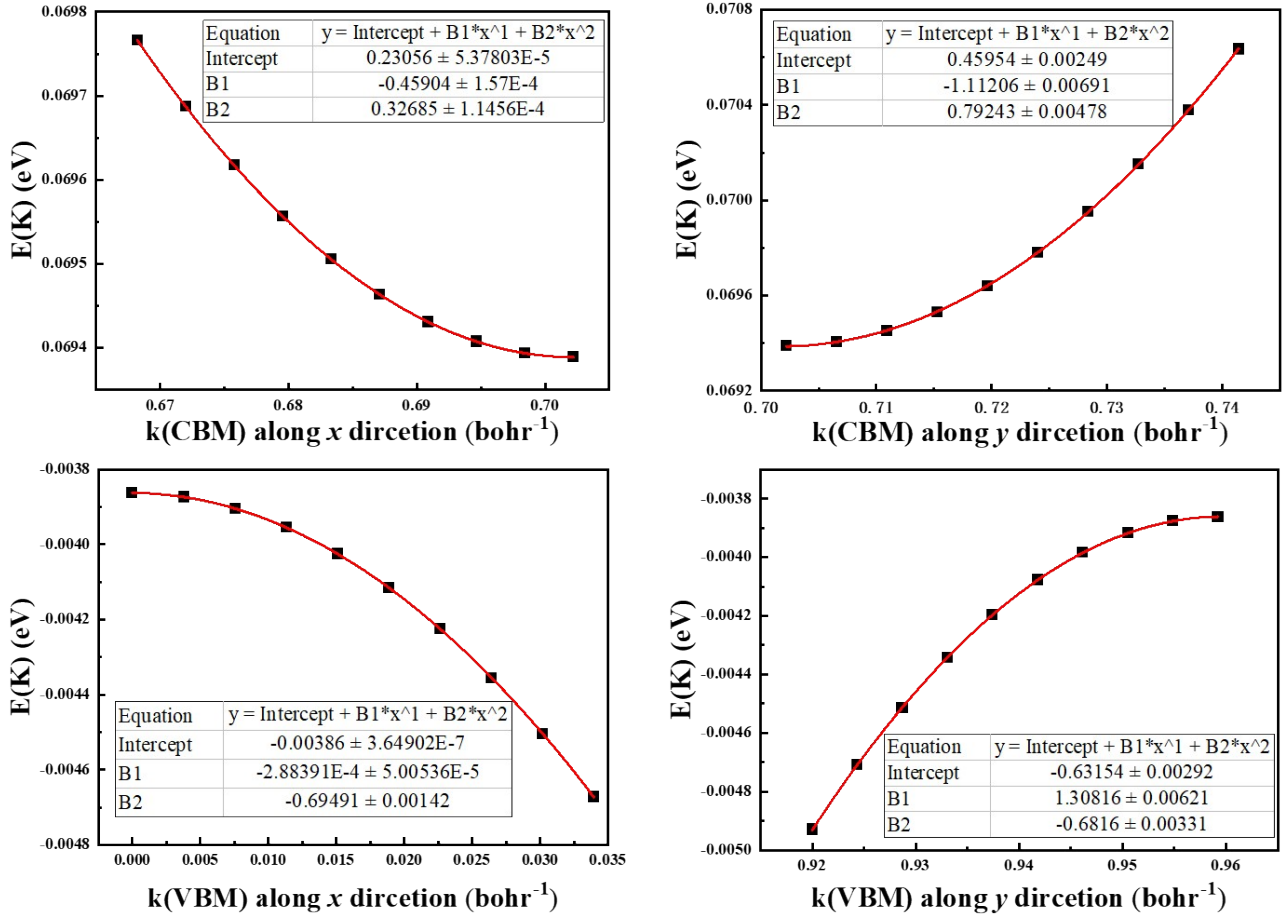

**Figure S5.** The fitted curves of  $E(k)$ - $k$  of  $\text{Sc}_2\text{S}_3$ , where  $E(k)$  is the energy of  $k$  states around the conduction band minimum (CBM) or valence band maximum (VBM) in the first Brillouin zone, for calculate the corresponding effective masses.

**Table S1** Structural information of the predicted  $\text{Sc}_2\text{S}_3$  monolayer

| Phase                   | Space Group | Lattice Parameters<br>(Å, °)                              | Positions |         |         |         | Charge<br>( e ) |
|-------------------------|-------------|-----------------------------------------------------------|-----------|---------|---------|---------|-----------------|
|                         |             |                                                           | Atoms     | $x$     | $y$     | $z$     |                 |
| $\text{Sc}_2\text{S}_3$ | $P-3m1$     | $a = b = 3.73$<br>$\alpha = \beta = 90$<br>$\gamma = 120$ | Sc1       | 0.66667 | 0.33333 | 0.55879 | -1.77           |
|                         |             |                                                           | Sc2       | 0.33333 | 0.66667 | 0.44121 | -1.77           |
|                         |             |                                                           | S1        | 0.66667 | 0.33333 | 0.39896 | 1.09            |
|                         |             |                                                           | S2        | 0.33333 | 0.66667 | 0.60104 | 1.09            |
|                         |             |                                                           | S3        | 0.00000 | 0.00000 | 0.50000 | 1.35            |
